# Supplementary material for: Investigating the Epigenetic Effects of a Prototype Smoke-Derived Carcinogen in Human Cells
Source: PubMed Central journal article supplement (PMC2868871; doi:10.1371/journal.pone.0010594), 2010-05-12
Supplement: pone.0010594.s005.pdf [file pone.0010594.s005.pdf]

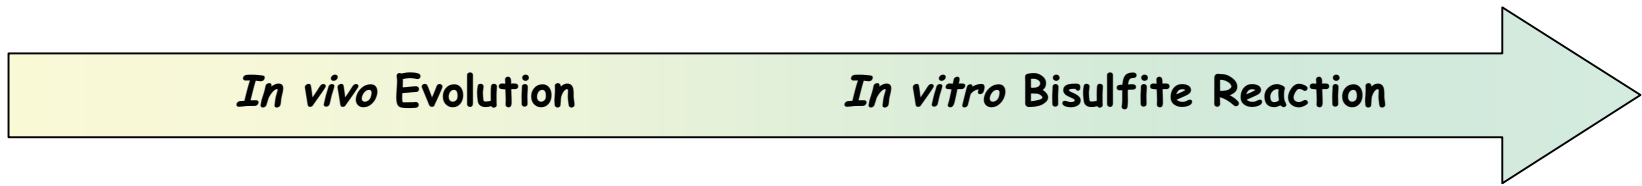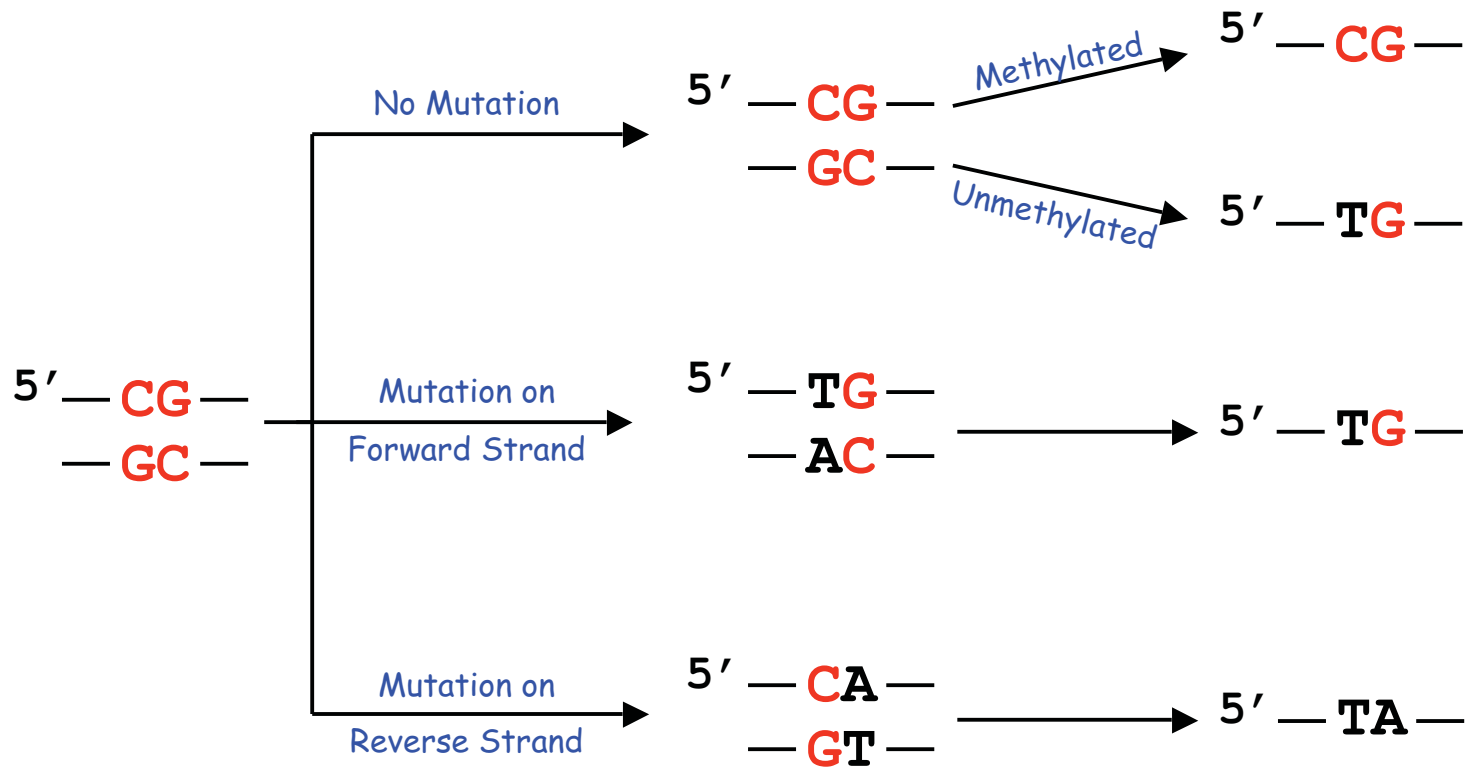

Fig. S5
